# Supplementary material
Source: publisher site journal article supplement (https://www.spandidos-publications.com/1473/downloadSupplementary)
Supplement: Supplementary file 2 [file downloadSupplementary]

## Sheet: Sheet1
Table SII. Potential targets of NOTCH3 screened by two methods.
miRNAs significantly down-regulated in GSE47841 (n=219)	miRNAs targeting Notch3 predicted by miRWalk database (n=100)	Intersection of List A and B (n=11)
hsa-miR-424	hsa-miR-573	hsa-miR-1299
hsa-miR-383	hsa-miR-1299	hsa-miR-491-5p
hsa-miR-381	hsa-miR-512-5p	hsa-miR-890
hsa-miR-140-3p	hsa-miR-1	hsa-miR-765
hsa-miR-542-5p	hsa-miR-1293	hsa-miR-485-5p
hp_hsa-mir-214_s	hsa-miR-660-5p	hsa-miR-486-3p
hp_hsa-mir-500b	hsa-miR-637	hsa-miR-1827
hsa-miR-135a	hsa-miR-1284	hsa-miR-423-5p
hsa-miR-4269	hsa-miR-206	hsa-miR-635
hsa-miR-874	hsa-let-7b-3p	hsa-miR-532-3p
hsa-miR-4324	hsa-miR-491-5p	hsa-miR-532-5p
hsa-miR-362-5p	hsa-miR-890
hsa-miR-502-3p	hsa-miR-149-5p
hsa-miR-500	hsa-miR-765
hp_hsa-mir-500_x	hsa-miR-510-5p
hsa-miR-424	hsa-miR-449b-5p
hsa-miR-376c	hsa-miR-485-5p
hsa-miR-127-5p	hsa-miR-150-3p
hsa-miR-887	hsa-miR-650
hsa-miR-500	hsa-miR-613
hp_hsa-mir-500b_x	hsa-miR-486-3p
hsa-miR-493	hsa-miR-150-5p
hsa-miR-143	hsa-miR-3673
hsa-miR-574-3p	hsa-miR-1286
hsa-miR-532-5p	hsa-miR-188-3p
hsa-miR-154	hsa-miR-762
hsa-miR-29c	hsa-miR-3616-5p
hsa-miR-532-3p	hsa-miR-331-3p
hsa-miR-204	hsa-miR-192-5p
hsa-miR-299-3p	hsa-miR-4795-5p
hp_hsa-mir-501_x	hsa-let-7a-3p
hp_hsa-mir-143	hsa-miR-34c-5p
hsa-miR-99a	hsa-miR-5011-5p
hsa-miR-501-3p	hsa-miR-4698
hsa-miR-127-3p	hsa-miR-296-3p
hsa-miR-29b-2	hsa-miR-211-3p
hsa-miR-188-5p	hsa-miR-4268
hsa-miR-433	hsa-miR-149-3p
hsa-miR-134	hsa-miR-4419a
hp_hsa-mir-362	hsa-miR-3173-3p
hsa-miR-1271	hsa-miR-4292
hsa-miR-503	hsa-miR-513b-5p
hsa-miR-214	hsa-miR-4505
hsa-miR-214	hsa-miR-1827
hsa-miR-494	hsa-miR-186-3p
hsa-miR-485-5p	hsa-miR-423-5p
hsa-miR-99a	hsa-miR-602
hsa-miR-212	hsa-miR-1260a
hp_hsa-mir-134	hsa-miR-759
hsa-let-7c	hsa-miR-875-3p
hsa-miR-495	hsa-miR-4495
hp_hsa-mir-532	hsa-miR-1226-3p
hsa-miR-654-3p	hsa-miR-3612
hp_hsa-mir-502_x	hsa-miR-7-5p
hsa-miR-199a-5p	hsa-miR-26a-1-3p
hsa-let-7c	hsa-miR-578
hsa-miR-145	hsa-miR-5692a
hsa-miR-337-5p	hsa-miR-548k
hsa-miR-1291	hsa-miR-34a-5p
hsa-miR-98	hsa-miR-608
hsa-miR-362-3p	hsa-miR-875-5p
v11_hsa-miR-1300	hsa-miR-4510
hsa-miR-143	hsa-miR-4476
hsa-miR-101	hsa-miR-3605-5p
hsa-miR-451	hsa-miR-2467-5p
hsa-miR-202	hsa-let-7f-1-3p
hp_hsa-mir-423_s	hsa-miR-3646
hsa-miR-328	hsa-miR-664a-3p
hsa-miR-377	hsa-miR-1253
hsa-miR-199b-3p	hsa-miR-4760-3p
hsa-miR-3122	hsa-miR-635
hsa-miR-379	hsa-miR-4659a-5p
hsa-miR-125b	hsa-miR-4718
hsa-miR-486-5p	hsa-miR-215-5p
hp_hsa-mir-4253_x	hsa-miR-4723-5p
hsa-miR-199a-3p	hsa-miR-4499
hsa-miR-370	hsa-miR-4447
hsa-miR-145	hsa-miR-3150a-3p
hsa-let-7b	hsa-miR-27a-3p
hsa-miR-432	hsa-miR-524-5p
hsa-miR-29b	hsa-miR-532-3p
hp_hsa-mir-874	hsa-miR-513a-5p
hsa-miR-140-5p	hsa-miR-1913
hsa-miR-29c	hsa-miR-877-3p
hsa-miR-423-5p	hsa-miR-4514
hsa-miR-100	hsa-miR-185-3p
hp_hsa-mir-199a-1_x	hsa-miR-4528
hsa-miR-320c	hsa-miR-4472
hp_hsa-mir-505_x	hsa-miR-556-3p
hsa-miR-615-3p	hsa-miR-4492
hp_hsa-mir-140	hsa-miR-4727-5p
hsa-miR-34a	hsa-miR-3689d
hsa-miR-34a	hsa-miR-146b-3p
hsa-miR-320e	hsa-miR-296-5p
hsa-miR-1225-5p	hsa-miR-4710
hsa-miR-411	hsa-miR-4659b-5p
hsa-miR-665	hsa-miR-6127
hsa-miR-132	hsa-miR-323a-5p
hsa-miR-4253	hsa-miR-532-5p
hp_hsa-mir-1227	hsa-miR-3659
hsa-miR-431
hsa-miR-371-5p
hsa-miR-423-3p
hp_hsa-mir-501
hsa-miR-501-5p
hsa-miR-658
hsa-miR-635
hsa-miR-487b
hsa-miR-377
hsa-miR-769-5p
hp_hsa-mir-548f-5
hsa-miR-125b-2
hsa-miR-125b-1
hsa-miR-660
hp_hsa-mir-503
hsa-miR-1285
hsa-miR-382
hsa-miR-202
hp_hsa-mir-877
hsa-miR-765
hsa-miR-455-5p
hsa-miR-654-5p
hsa-miR-711
hsa-miR-221
hp_hsa-mir-98
hp_hsa-mir-132
hsa-miR-339-3p
hp_hsa-mir-424
hsa-miR-628-5p
hp_hsa-mir-548c_x
hp_hsa-mir-1910
hsa-miR-3172
hsa-miR-324-3p
hp_hsa-mir-548g
hp_hsa-mir-4302
hp_hsa-mir-3132
hsa-miR-491-5p
hp_hsa-let-7c_x
hsa-miR-758
hp_hsa-mir-125b-2_x
hp_hsa-mir-615
hsa-miR-664
hp_hsa-mir-487b_x
hsa-miR-26b
hsa-miR-1294
hsa-miR-606
hsa-miR-502-5p
hp_hsa-mir-502
hp_hsa-mir-4269
hsa-miR-886-5p
hsa-miR-3152
hp_hsa-mir-660
hsa-miR-320a
hp_hsa-mir-455
hsa-miR-320b
hp_hsa-mir-887
hsa-miR-541
hsa-miR-575
hsa-miR-1273c
hsa-miR-4271
hp_hsa-mir-524_x
hsa-miR-1302
hp_hsa-mir-1271
hsa-miR-628-3p
hsa-miR-3202
hsa-miR-152
hsa-miR-1278
hsa-miR-331-5p
hsa-miR-342-5p
hsa-miR-1180
hsa-miR-29a
hsa-miR-548q
hsa-miR-1827
hp_hsa-mir-381
hsa-miR-126
hsa-miR-486-3p
hsa-miR-543
hsa-miR-4329
hsa-miR-557
hp_hsa-mir-486_x
hp_hsa-mir-542
hsa-miR-3162
hsa-miR-1299
hsa-miR-601
hsa-miR-708
hsa-miR-2114
hsa-miR-518c
hsa-miR-144
hsa-miR-1258
hsa-miR-455-3p
hsa-miR-3191
hsa-miR-3136
hp_hsa-mir-487b
hsa-miR-570
hsa-miR-3121
hsa-miR-299-5p
hp_hsa-mir-1249
hp_hsa-mir-27b
hsa-miR-3126-3p
hp_hsa-let-7c
hsa-miR-4306
hsa-miR-148a
hsa-miR-195
hsa-miR-1273d
hsa-miR-155
hsa-miR-1224-5p
hsa-miR-890
hsa-miR-326
hp_hsa-mir-377
hp_hsa-mir-188
hsa-miR-505
hsa-miR-551b
hp_hsa-mir-1289-2_x
hsa-miR-488
hsa-miR-320d
hsa-miR-193a-5p
hp_hsa-let-7i
hsa-miR-509-3-5p
hsa-miR-329
